# Supplementary material for: Alterations in Cortisol and Interleukin-6 Secretion in Patients With COVID-19 Suggestive of Neuroendocrine-Immune Adaptations
Source: Research Square preprint supplement (doi:10.21203/rs.3.rs-1044264/v1), 2021-11-08
Supplement: Supplementary file 1 [file 6cd3c5555ac9088402b40fd0.docx]

**Legends for supplementary figures**

**Sup. Fig. 1. Serum CRP levels are positively correlated with those of serum IL-6 in COVID-19 patients (n=52).**

COVID-19 patients are classified according to the severity of the disease (<https://www.covid19treatmentguidelines.nih.gov/overview/clinical-spectrum/>), and their clinical course during the 4-week follow-up period of the study.

*: p<0.05 is considered statistically significant.

CRP, C-reactive protein; IL-6, interleukin -6.

**Sup. Fig. 2. Diurnal variation of salivary DHEA in a subset of COVID-19 patients (n=30) classified according to the severity of the disease and their matched healthy controls (n=30).**

a) Cumulative salivary DHEA levels in controls (n=28) and patients with mild-stable (n=11), moderate-stable (n=9) or moderate-progressed (n=7) COVID-19. Only patients without missing value at any timepoint were included in this analysis; b) time-integrated daily DHEA secretion (calculated as the area under the curve|) in COVID-19 patients and controls.

COVID-19 patients are classified according to the severity of the disease (<https://www.covid19treatmentguidelines.nih.gov/overview/clinical-spectrum/>), and their clinical course during the 4-week follow-up period of the study.

Values are shown as mean ± SEM

DHEA, dehydroepiandrosterone; AUC, are under the curve.

**Sup. Fig.3. Diurnal variation of salivary IL-6 levels in a subset of COVID-19 patients (n=17).**

a) Cumulative IL-6 levels, b) individual measurements.

IL-6, interleukin-6.
